# Supplementary material for: Transcriptomic Profiling of the Adaptive and Innate Immune Responses of Atlantic Salmon to Renibacterium salmoninarum Infection
Source: Front Immunol. 2020 Oct 28;11:567838. doi: 10.3389/fimmu.2020.567838 (PMC7656060; doi:10.3389/fimmu.2020.567838)
Supplement: Supplementary file 6 [file Table_5.XLSX]

## Sheet: Supplemental Table S5.
Supplemental Table S5.
Correlation analyses for the expression of qPCR-studied transcripts with the level of R. salmoninarum infection.
Probe ID 1	Name 2	Symbol 2	Venn diagram 3	Putative immune process 4	Pearson r 5	P value 5	Significant correlation (p < 0.05)
C104R025	cathelicidin antimicrobial peptide	camp	6285	innate immune response	0.7183	0.0026	Yes
C138R106	caspase-14	casp14	289	innate immune response	0.7477	0.0014	Yes
C180R124	C-C chemokine	ccl	6285	innate immune response	0.6855	0.0048	Yes
C038R017	B-cadherin-like	cdh1	289	APC functions	-0.6231	0.0131	Yes
C254R096	claudin-1	cldn1	6285	innate immune response	0.7385	0.0017	Yes
C100R049	dual specificity protein phosphatase 7	dusp7	1176	lymphocyte functions	0.745	0.0014	Yes
C082R134	leucine-rich repeat transmembrane protein FLRT3	flrt3	20	APC functions	-0.6957	0.004	Yes
C123R037	guanine deaminase	gda	69	unknown	0.8178	0.0002	Yes
C114R097	interferon-induced very large GTPase 1	gvinp1	69	immune regulation	0.8067	0.0003	Yes
C024R063	granzyme a precursor	gzma	123	lymphocyte functions	0.8717	<0.0001	Yes
C077R073	E3 ubiquitin-protein ligase herc6	herc6	6285	innate immune response	0.8897	<0.0001	Yes
C039R012	leukemia inhibitory factor receptor	lifr	123	lymphocyte differentiation	0.9046	<0.0001	Yes
C088R033	macrophage receptor with collagenous structure	marco	289	innate immune response	-0.6582	0.0076	Yes
C044R092	matrix metallopeptidase-19	mmp19	289	lymphocyte differentiation	0.8697	<0.0001	Yes
C139R032	radical s-adenosyl methionine domain containing (alias viperin)	rsad2	6285	innate immune response	0.7127	0.0029	Yes
C183R035	receptor-transporting protein 3	rtp3	6285	unknown	0.763	0.0009	Yes
C022R023	suppressor of cytokine signalling 1	socs1	6285	immune regulation	0.7625	0.0009	Yes
C240R068	C-C motif chemokine 4	ccl4	6285	lymphocyte differentiation	0.6533	0.0083	Yes
C124R063	C-type lectin domain family 4 member E	clec4e	289	innate immune response	-0.6392	0.0103	Yes
C103R101	down syndrome cell adhesion molecule	dscam	69	unknown	-0.597	0.0188	Yes
C203R104	fc receptor-like protein 5	fcrl5	1176	lymphocyte functions	0.5388	0.0382	Yes
C025R082	interferon gamma	ifng	6285	lymphocyte differentiation	0.6736	0.0059	Yes
C059R109	interleukin 13 receptor alpha 1b	il13ra1b	123	lymphocyte functions	-0.5362	0.0394	Yes
C262R115	interferon regulatory factor 1	irf1	289	lymphocyte differentiation	0.6802	0.0053	Yes
C246R067	receptor-interacting serine/threonine-protein kinase 2	ripk2	289	lymphocyte functions	0.6274	0.0123	Yes
C044R087	receptor-transporting protein 2	rtp2	6285	unknown	0.5863	0.0216	Yes
C049R049	tumor necrosis factor ligand superfamily member 14	tnfsf14	289	APC functions	0.5579	0.0307	Yes
C053R063	interleukin-7 receptor subunit alpha	il7r	1176	lymphocyte differentiation	0.04777	0.8658	No
C101R131	high affinity immunoglobulin gamma Fc receptor I	fcgr1	145	APC functions	-0.05619	0.8424	No
C102R169	E3 ubiquitin-protein ligase RNF144a-a	rnf144a	6285	lymphocyte functions	0.3889	0.152	No
C085R135	immune-responsive gene 1 ; alias aconitate decarboxylase 1	irg1	6285	immune regulation	0.402	0.1374	No
C133R147	matrix metallopeptidase-13	mmp13	6285	lymphocyte functions	0.1205	0.6688	No
C171R164	haemoglobin subunit beta	hbb	6285	immune regulation	-0.389	0.1518	No
C104R134	kruppel-like factor 4	klf4	6285	lymphocyte differentiation	-0.3913	0.1492	No
C103R136	C-C chemokine receptor type 5	ccr5	6285	lymphocyte differentiation	-0.3712	0.1732	No
C159R067	prostaglandin D2 synthase	ptgds	6285	immune regulation	-0.4467	0.095	No
C203R087	gelsolin	gsn	6285	immune regulation	-0.4298	0.1098	No
C230R106	receptor-type tyrosine-protein phosphatase kappa-like	ptprk	6285	lymphocyte functions	-0.3201	0.2448	No
C229R052	peroxiredoxin-like 2a; alias adiporedoxin	prxl2a	6285	immune regulation	-0.4216	0.1176	No
C131R097	toll-like receptor 13	tlr13	6285	innate immune response	-0.4166	0.1225	No
C184R006	NADH dehydrogenase [ubiquinone] 1 alpha subcomplex assembly factor 3	ndufaf3	6285	immune regulation	-0.3973	0.1425	No
C149R076	dedicator of cytokinesis protein 8	dock8	1176	lymphocyte differentiation	0.2972	0.282	No
C147R073	lipase maturation factor 2	lmf2	1176	unknown	0.2598	0.3498	No
C263R144	MAP3K12-binding inhibitory protein 1	mbip	1176	unknown	0.2407	0.3876	No
C163R102	protein kinase c delta type	prkcd	1176	lymphocyte functions	0.07451	0.7919	No
C244R146	n-myc downstream-regulated gene	ndrg2	1176	APC functions	-0.2298	0.41	No
C029R163	cyclin-dependent kinase inhibitor 2c	cdkn2c	289	lymphocyte differentiation	-0.4238	0.1154	No
C249R142	stabilin-1	stab1	289	innate immune response	-0.4298	0.1098	No
C146R161	inactive carboxypeptidase-like protein X2	cpxm2	123	unknown	-0.4908	0.0632	No
C253R009	transcription factor Sox-9-b	sox9b	145	immune regulation	-0.1026	0.7158	No
C230R100	interleukin-1 beta	il1b	6285	lymphocyte differentiation	0.4033	0.136	No
C024R134	C-C motif chemokine 13	ccl13	6285	innate immune response	0.03205	0.9097	No
C121R047	tumor necrosis factor receptor superfamily member 11B	tnfrsf11b	6285	immune regulation	0.106	0.7069	No
C201R032	hepcidin antimicrobial peptide	hamp	6285	innate immune response	0.2244	0.4214	No
C089R112	tumor necrosis factor receptor superfamily member 6B	tnfrsf6b	123	lymphocyte functions	0.4827	0.0684	No
C102R134	claudin 4	cldn4	6285	immune regulation	0.08242	0.7703	No
C108R146	fatty acid-binding protein 4, adipocyte	fabp4	6285	immune regulation	-0.3407	0.214	No
C180R083	tropomodulin-4-like	tmod4	6285	unknown	-0.3944	0.1457	No
C108R122	complement factor D precursor	cfd	6285	innate immune response	0.1904	0.4966	No
C058R118	cholesterol 25-hydroxylase-like protein A	ch25ha	6285	immune regulation	0.3442	0.209	No
C171R070	C-X-C chemokine receptor type 1	cxcr1	6285	immune regulation	-0.3797	0.1628	No
C210R159	E3 ubiquitin-protein ligase znrf1	znrf1	6285	immune regulation	0.4603	0.0843	No
C007R144	major histocompatibility class I	mh1	6285	APC functions	0.4177	0.1213	No
C142R094	t-cell receptor alpha	tcra	1176	lymphocyte functions	-0.234	0.4012	No
C147R138	toll-like receptor 5	tlr5	6285	innate immune response	0.3057	0.2678	No
1 Microarray Probe Identifier.
2 Transcripts with bold names and associated gene symbols showed significant correlations with the levels of R. salmoninarum 16S ribosomal RNA, without including the control samples in the analyses.
3 Venn diagram group, representing the significant transcript list overlapping between comparisons or specific to a given comparison in microarray results, as shown in Figure 1A.
4 Putative immune-related function associated with each transcript.
5 The r and p values, resulted from Pearson's Correlation analysis, for the expression level of each transcript with the expression level of R. salmoninarum 16S ribosomal RNA in samples.
